# Supplementary material for: Identification of single nucleotide polymorphisms (SNPs) potentially associated with residual feed intake in Qinchuan beef cattle by hypothalamus and duodenum RNA-Seq data
Source: PeerJ. 2025 Apr 15;13:e19270. doi: 10.7717/peerj.19270 (PMC12007499; doi:10.7717/peerj.19270)
Supplement: Supplemental Information 3 [file peerj-13-19270-s003.xlsx]

## Sheet: Table S3
Table S3: Specific high-impact SNP information in the high RFI group.
Chrosome	Site	Reference	Mutated	Gene_name
10	1769935	A	G	EPB41L4A
11	7280369	G	A	SLC9A4
11	47484569	G	A	EIF2AK3
11	67288228	C	T	GKN2
11	96046484	C	A	PPP6C
11	103375226	G	A	KCNT1
11	104187200	C	G	ABO
12	14094107	G	A	LACC1
12	52274876	C	G	MYCBP2
13	17956437	C	T	PDSS1
13	33129973	G	A	EPC1
13	34621632	A	T	SVIL
13	67179365	T	C	BPI
15	45762324	C	T	ZNF215
15	46383826	G	C	MRPL17
15	82999213	T	C	STX3
16	5066460	C	T	ENSBTAG00000053066
16	51957008	T	C	AGMAT
16	75584475	G	A	CD46
16	75596651	A	T	CD46
17	18389606	T	A	NDUFC1
18	9470134	G	A	CDH13
18	14492494	C	T	RPL13
18	49087189	C	T	PAF1
18	55238596	A	C	SULT2B1
18	60291490	A	T	ENSBTAG00000034090
18	60292356	G	A	ENSBTAG00000034090
18	62754865	C	A	KIR2DS1
19	20256886	G	A	FLOT2
19	55198792	T	C	ENSBTAG00000053829
1	137020308	G	T	ACAD11
20	33553939	A	T	C7
21	5195682	A	C	GABRG3
21	5195683	G	A	GABRG3
21	33702492	G	A	SCAMP5
21	66941687	C	T	HSP90AA1
22	47728841	T	G	TKT
23	3694541	G	T	ENSBTAG00000021237
23	7175097	A	T	PSMB8
23	7388203	T	C	SLC39A7
23	25879415	C	T	BTNL2
23	27874339	G	A	ENSBTAG00000012208
23	28492239	G	T	ENSBTAG00000001477
23	28526939	C	A	ENSBTAG00000005146
23	28527135	T	G	ENSBTAG00000005146
23	28549779	C	G	BOLA-NC1
23	28664385	A	C	JSP.1
23	32398886	T	A	CARMIL1
23	33087849	A	T	TDP2
23	33087850	G	C	TDP2
27	15121663	T	G	CENPU
27	34116998	A	G	PLEKHA2
28	1329591	T	A	ENSBTAG00000050985
29	12723929	C	T	DDIAS
29	18525245	A	T	PAK1
29	50629700	C	T	EPS8L2
2	25101057	A	G	METTL8
2	103384060	T	G	FN1
2	124851276	C	T	ENSBTAG00000048228
2	132645789	G	A	PLA2G5
2	135350229	G	T	PADI1
3	9540257	C	G	ATP1A2
3	14446901	C	G	RHBG
3	53917050	G	A	ENSBTAG00000048959
3	53917051	T	G	ENSBTAG00000048959
3	100364565	G	A	ENSBTAG00000051822
3	100731821	T	C	HPDL
3	120429606	T	A	HDLBP
4	10791602	C	T	CALCR
4	91916701	T	G	SND1
5	26336276	T	C	CALCOCO1
5	28462939	G	T	CELA1
5	57149883	T	A	SMARCC2
5	102063276	G	T	WC-7
5	113944346	A	C	TTLL12
6	77624441	T	C	ADGRL3
6	88500061	G	A	ALB
7	20115343	T	C	ENSBTAG00000051828
7	21580497	T	G	SEPTIN8
7	30358044	G	A	CEP120
7	43417360	G	C	CFD
7	79873291	C	T	TENM2
8	100423220	G	A	LPAR1
9	61219457	T	G	RNGTT
9	65256352	G	A	CEP162
9	82980398	C	T	EPM2A
9	102347872	G	C	AFDN
X	56331224	G	A	TSC22D3
X	138768643	A	C	CD99
X	138773479	C	T	CD99
