# Supplementary material for: Identification of single nucleotide polymorphisms (SNPs) potentially associated with residual feed intake in Qinchuan beef cattle by hypothalamus and duodenum RNA-Seq data
Source: PeerJ. 2025 Apr 15;13:e19270. doi: 10.7717/peerj.19270 (PMC12007499; doi:10.7717/peerj.19270)
Supplement: Supplemental Information 4 [file peerj-13-19270-s004.xlsx]

## Sheet: Table S4
Table S4: Specific high-impact SNP information in the low RFI group.
Chrosome	Site	Reference	Mutated	Gene_name
10	26911104	T	G	OR11G2
10	35613738	T	A	EIF2AK4
10	49829764	T	A	ANXA2
10	55099772	G	A	RSL24D1
10	58651948	C	T	SCG3
10	58683059	A	T	SCG3
10	88534824	C	T	GSTZ1
10	102986175	C	T	SPG11
11	26001001	C	G	DYNC2LI1
11	47234099	C	T	ENSBTAG00000003408
11	48293589	G	A	RNF103
11	62416573	C	T	VPS54
11	92323052	C	T	GGTA1
11	98072145	G	C	GARNL3
11	99133662	T	A	SPTAN1
11	100257541	A	C	USP20
11	102692306	C	T	DDX31
12	11498838	G	A	NAA16
12	11498839	T	A	NAA16
12	15152566	A	T	NUFIP1
12	15152567	C	T	NUFIP1
12	24148668	G	A	TRPC4
13	23414730	C	A	ENSBTAG00000051361
13	32067042	C	T	HACD1
13	40152207	G	T	RALGAPA2
13	51521766	C	T	ADAM33
13	52131106	A	T	MRPS26
13	53392833	C	G	ENSBTAG00000051981
13	54446580	C	T	SLC17A9
13	54449735	C	T	SLC17A9
13	64240677	C	A	GSS
14	16107321	C	A	FAM91A1
14	80908782	G	A	IMPA1
15	43160572	C	T	ZNF143
15	53718210	A	G	PGM2L1
15	54895873	A	G	MOGAT2
16	18859871	G	A	KCTD3
16	39929733	G	A	C16H1orf105
17	196517	C	T	TMEM192
17	196518	T	A	TMEM192
17	4333285	C	T	TRIM2
17	54212133	T	A	ATP2A2
17	54330469	T	G	ENSBTAG00000053945
17	62304301	C	T	ALDH2
17	68629062	T	C	AP1B1
17	70276010	G	A	SFI1
18	25073969	A	T	NLRC5
18	36276378	T	A	TANGO6
18	57103030	C	T	ENSBTAG00000049494
18	59355913	C	A	ENSBTAG00000051367
18	61158589	G	T	ENSBTAG00000000336
19	9472438	C	G	SEPTIN4
19	14564197	C	T	TAF15
19	33287033	C	T	PIGL
19	41938857	C	A	HAP1
19	45498365	A	G	NSF
19	54798341	A	G	ENSBTAG00000051647
1	9983051	A	T	CYYR1
1	57364461	G	A	CCDC80
1	80518927	A	C	KNG1
1	87103224	T	G	PEX5L
1	106152004	C	T	NMD3
1	130499555	A	T	FAIM
1	144228266	G	A	ENSBTAG00000014880
20	26167963	C	G	ITGA1
20	71835720	A	G	LRRC14B
21	15874225	C	T	SV2B
21	54848539	C	T	FKBP3
21	58694364	C	G	ENSBTAG00000031834
22	6637883	A	C	GPD1L
22	7832585	C	G	CLASP2
22	48594821	A	G	GLYCTK
22	48973354	G	A	PCBP4
22	48973355	T	A	PCBP4
23	17092539	C	T	XPO5
23	25583832	T	A	ENSBTAG00000009656
23	25806424	T	A	ENSBTAG00000038397
23	26168225	T	A	ENSBTAG00000050817
23	27259944	T	C	ATF6B
23	27836723	T	C	BoLA
23	28664249	C	T	JSP.1
23	50526997	A	T	TUBB2A
24	21086582	G	A	RPRD1A
24	50564735	G	A	SMAD4
25	1521521	C	G	RPS2
25	10730541	T	A	SNX29
25	16439095	T	A	ARL6IP1
25	18523339	G	C	ACSM3
25	26494300	G	T	QPRT
25	32984477	C	T	GTF2IRD1
25	36975071	G	A	ENSBTAG00000020440
26	40880927	T	G	WDR11
26	51867629	T	A	STK32C
26	51960044	A	C	LRRC27
28	3168922	G	A	FMN2
28	3168923	C	T	FMN2
28	5984019	C	T	PCNX2
28	9177737	G	A	LGALS8
28	28153420	C	G	SPOCK2
28	35158698	T	G	ANXA11
29	17459950	T	G	NARS2
29	22036340	G	A	ENSBTAG00000054222
29	22036341	T	C	ENSBTAG00000054222
29	44531469	T	A	DPP3
2	13544894	T	C	NCKAP1
2	30381630	T	C	TTC21B
2	79545563	A	T	STAT1
2	119017206	T	A	ARMC9
2	120166066	C	T	PRSS56
2	129067343	G	A	FUCA1
3	15122211	T	G	ASH1L
3	20556230	T	A	VPS45
3	21516945	T	A	NUDT17
3	45674725	G	A	DPYD
3	49406956	G	A	ABCA4
3	85912032	G	C	ENSBTAG00000051904
3	91843121	G	T	SSBP3
3	91843122	T	G	SSBP3
3	93939741	C	G	PRPF38A
3	106635031	A	T	MACF1
3	106742051	A	T	MACF1
3	116999786	G	A	MLPH
3	120424583	C	G	HDLBP
4	25130690	A	G	BZW2
4	32440701	C	T	ENSBTAG00000015666
4	32913678	G	C	ENSBTAG00000005997
4	94363823	A	C	COPG2
4	98740515	G	A	AGBL3
4	106074677	G	A	PRSS2
5	9370779	A	T	PPP1R12A
5	24067034	G	C	ENSBTAG00000052916
5	27043941	G	A	KRT8
5	31000496	A	G	ADCY6
5	41909432	G	A	KIF21A
5	44509457	A	G	LYZ
5	49351238	C	T	XPOT
5	57209938	A	T	PA2G4
5	77174829	A	C	DNM1L
5	103822815	T	A	CHD4
5	113436289	C	T	RRP7
5	113485291	T	G	CYB5R3
5	114098507	T	C	SCUBE1
6	23720548	G	C	PPP3CA
6	29962171	A	T	PDLIM5
6	30138592	C	G	PDLIM5
6	68888795	C	T	SCFD2
6	86053553	T	C	ENSBTAG00000055134
6	92954806	A	C	FRAS1
6	93328720	A	G	ANXA3
7	5727925	G	T	ENSBTAG00000045588
7	7746877	T	C	AKAP8L
7	15889262	G	C	CNN1
7	20346465	T	C	ENSBTAG00000053812
7	61750990	T	A	CD74
7	110454467	G	A	CAMK4
8	41860034	C	T	ENSBTAG00000048500
8	110588863	G	T	ENSBTAG00000054630
8	111319641	G	C	ENSBTAG00000051710
9	59698567	A	T	MAP3K7
MT	11329	A	G	ND4
MT	12672	G	A	ND5
MT	14066	C	T	ND6
X	13604066	G	A	OCRL
X	18200760	G	A	HPRT1
X	85941547	A	C	ARAF
