# Supplementary material for: Identification of single nucleotide polymorphisms (SNPs) potentially associated with residual feed intake in Qinchuan beef cattle by hypothalamus and duodenum RNA-Seq data
Source: PeerJ. 2025 Apr 15;13:e19270. doi: 10.7717/peerj.19270 (PMC12007499; doi:10.7717/peerj.19270)
Supplement: Supplemental Information 6 [file peerj-13-19270-s006.xlsx]

## Sheet: Sheet1
Tabble S6: codon changes with low RFI(rows are reference codons and columns are changed codons).
codons	AAA	AAC	AAG	AAT	ACA	ACC	ACG	ACT	AGA	AGC	AGG	AGT	ATA	ATC	ATG	ATT	CAA	CAC	CAG	CAT	CCA	CCC	CCG	CCT	CGA	CGC	CGG	CGT	CTA	CTC	CTG	CTT	GAA	GAC	GAG	GAT	GCA	GCC	GCG	GCT	GGA	GGC	GGG	GGT	GTA	GTC	GTG	GTT	TAA
AAA	0	7	26	1	6	0	0	0	21	0	0	0	3	0	0	0	13	0	0	0	0	0	0	0	0	0	0	0	0	0	0	0	12	0	0	0	0	0	0	0	0	0	0	0	0	0	0	0	1
AAC	4	0	7	43	0	5	0	0	0	34	0	0	0	2	0	0	0	2	0	0	0	0	0	0	0	0	0	0	0	0	0	0	0	27	0	0	0	0	0	0	0	0	0	0	0	0	0	0	0
AAG	25	11	0	10	0	0	7	0	0	0	28	0	0	0	10	0	0	0	9	0	0	0	0	0	0	0	0	0	0	0	0	0	0	0	17	0	0	0	0	0	0	0	0	0	0	0	0	0	0
AAT	2	18	6	0	0	0	0	1	0	0	0	55	0	0	0	0	0	0	0	5	0	0	0	0	0	0	0	0	0	0	0	0	0	0	0	33	0	0	0	0	0	0	0	0	0	0	0	0	0
ACA	13	0	0	0	0	6	29	4	2	0	0	0	14	0	0	0	0	0	0	0	0	0	0	0	0	0	0	0	0	0	0	0	0	0	0	0	44	0	0	0	0	0	0	0	0	0	0	0	0
ACC	0	6	0	0	15	0	7	44	0	12	0	0	0	26	0	0	0	0	0	0	0	4	0	0	0	0	0	0	0	0	0	0	0	0	0	0	0	39	0	0	0	0	0	0	0	0	0	0	0
ACG	0	0	4	0	46	7	0	3	0	0	3	0	0	0	114	0	0	0	0	0	0	0	3	0	0	0	0	0	0	0	0	0	0	0	0	0	0	0	18	0	0	0	0	0	0	0	0	0	0
ACT	0	0	0	0	1	18	1	0	0	0	0	10	0	0	0	22	0	0	0	0	0	0	0	10	0	0	0	0	0	0	0	0	0	0	0	0	0	0	0	40	0	0	0	0	0	0	0	0	0
AGA	38	0	0	0	6	0	0	0	0	4	14	0	4	0	0	0	0	0	0	0	0	0	0	0	0	0	0	0	0	0	0	0	0	0	0	0	0	0	0	0	17	0	0	0	0	0	0	0	0
AGC	0	52	0	0	0	5	0	0	8	0	3	32	0	4	0	0	0	0	0	0	0	0	0	0	0	6	0	0	0	0	0	0	0	0	0	0	0	0	0	0	0	60	0	0	0	0	0	0	0
AGG	0	0	24	0	0	0	11	0	14	2	0	6	0	0	2	0	0	0	0	0	0	0	0	0	0	0	5	0	0	0	0	0	0	0	0	0	0	0	0	0	0	0	20	0	0	0	0	0	0
AGT	0	0	0	50	0	0	0	14	2	28	4	0	0	0	0	2	0	0	0	0	0	0	0	0	0	0	0	0	0	0	0	0	0	0	0	0	0	0	0	0	0	0	0	11	0	0	0	0	0
ATA	1	0	0	0	8	0	0	0	2	0	0	0	0	4	13	0	0	0	0	0	0	0	0	0	0	0	0	0	1	0	0	0	0	0	0	0	0	0	0	0	0	0	0	0	37	0	0	0	0
ATC	0	0	0	0	0	20	0	0	0	1	0	0	4	0	7	22	0	0	0	0	0	0	0	0	0	0	0	0	0	1	0	0	0	0	0	0	0	0	0	0	0	0	0	0	0	91	0	0	0
ATG	0	0	3	0	0	0	41	0	0	0	1	0	23	2	0	8	0	0	0	0	0	0	0	0	0	0	0	0	0	0	10	0	0	0	0	0	0	0	0	0	0	0	0	0	0	0	82	0	0
ATT	0	0	0	1	0	0	0	21	0	0	0	2	0	28	16	0	0	0	0	0	0	0	0	0	0	0	0	0	0	0	0	8	0	0	0	0	0	0	0	0	0	0	0	0	0	0	0	49	0
CAA	5	0	0	0	0	0	0	0	0	0	0	0	0	0	0	0	0	6	27	2	8	0	0	0	35	0	0	0	0	0	0	0	12	0	0	0	0	0	0	0	0	0	0	0	0	0	0	0	4
CAC	0	6	0	0	0	0	0	0	0	0	0	0	0	0	0	0	10	0	14	35	0	6	0	0	0	58	0	0	0	0	0	0	0	9	0	0	0	0	0	0	0	0	0	0	0	0	0	0	0
CAG	0	0	9	0	0	0	0	0	0	0	0	0	0	0	0	0	31	22	0	13	0	0	12	0	0	0	76	0	0	0	11	0	0	0	19	0	0	0	0	0	0	0	0	0	0	0	0	0	0
CAT	0	0	0	1	0	0	0	0	0	0	0	0	0	0	0	0	5	37	7	0	0	0	0	5	0	0	0	37	0	0	0	0	0	0	0	4	0	0	0	0	0	0	0	0	0	0	0	0	0
CCA	0	0	0	0	2	0	0	0	0	0	0	0	0	0	0	0	6	0	0	0	0	8	41	4	0	0	0	0	8	0	0	0	0	0	0	0	9	0	0	0	0	0	0	0	0	0	0	0	0
CCC	0	0	0	0	0	1	0	0	0	0	0	0	0	0	0	0	0	7	0	0	4	0	6	50	0	1	0	0	0	13	0	0	0	0	0	0	0	15	0	0	0	0	0	0	0	0	0	0	0
CCG	0	0	0	0	0	0	6	0	0	0	0	0	0	0	0	0	0	0	3	0	62	12	0	3	0	0	8	0	0	0	73	0	0	0	0	0	0	0	2	0	0	0	0	0	0	0	0	0	0
CCT	0	0	0	0	0	0	0	8	0	0	0	0	0	0	0	0	0	0	0	9	4	34	3	0	0	0	0	2	0	0	0	1	0	0	0	0	0	0	0	11	0	0	0	0	0	0	0	0	0
CGA	0	0	0	0	0	0	0	0	1	0	0	0	0	0	0	0	71	0	0	0	0	0	0	0	0	3	18	0	1	0	0	0	0	0	0	0	0	0	0	0	2	0	0	0	0	0	0	0	0
CGC	0	0	0	0	0	0	0	0	0	8	0	0	0	0	0	0	0	58	0	0	0	13	0	0	0	0	2	21	0	4	0	0	0	0	0	0	0	0	0	0	0	2	0	0	0	0	0	0	0
CGG	0	0	0	0	0	0	0	0	0	0	6	0	0	0	0	0	0	0	93	0	0	0	11	0	4	2	0	3	0	0	6	0	0	0	0	0	0	0	0	0	0	0	9	0	0	0	0	0	0
CGT	0	0	0	0	0	0	0	0	0	0	0	10	0	0	0	0	0	0	0	48	0	0	0	4	0	14	0	0	0	0	0	1	0	0	0	0	0	0	0	0	0	0	0	3	0	0	0	0	0
CTA	0	0	0	0	0	0	0	0	0	0	0	0	1	0	0	0	1	0	0	0	7	0	0	0	1	0	0	0	0	1	14	0	0	0	0	0	0	0	0	0	0	0	0	0	4	0	0	0	0
CTC	0	0	0	0	0	0	0	0	0	0	0	0	0	11	0	0	0	1	0	0	0	16	0	0	0	7	0	0	0	0	11	43	0	0	0	0	0	0	0	0	0	0	0	0	0	22	0	0	0
CTG	0	0	0	0	0	0	0	0	0	0	0	0	0	0	16	0	0	0	1	0	0	0	71	0	0	0	5	0	52	14	0	13	0	0	0	0	0	0	0	0	0	0	0	0	0	0	29	0	0
CTT	0	0	0	0	0	0	0	0	0	0	0	0	0	0	0	2	0	0	0	4	0	0	0	19	0	0	0	1	1	28	7	0	0	0	0	0	0	0	0	0	0	0	0	0	0	0	0	9	0
GAA	43	0	0	0	0	0	0	0	0	0	0	0	0	0	0	0	3	0	0	0	0	0	0	0	0	0	0	0	0	0	0	0	0	12	41	2	16	0	0	0	23	0	0	0	2	0	0	0	2
GAC	0	26	0	0	0	0	0	0	0	0	0	0	0	0	0	0	0	9	0	0	0	0	0	0	0	0	0	0	0	0	0	0	7	0	17	48	0	8	0	0	0	13	0	0	0	1	0	0	0
GAG	0	0	58	0	0	0	0	0	0	0	0	0	0	0	0	0	0	0	19	0	0	0	0	0	0	0	0	0	0	0	0	0	26	29	0	20	0	0	15	0	0	0	15	0	0	0	8	0	0
GAT	0	0	0	39	0	0	0	0	0	0	0	0	0	0	0	0	0	0	0	7	0	0	0	0	0	0	0	0	0	0	0	0	13	41	17	0	0	0	0	2	0	0	0	11	0	0	0	5	0
GCA	0	0	0	0	44	0	0	0	0	0	0	0	0	0	0	0	0	0	0	0	11	0	0	0	0	0	0	0	0	0	0	0	9	0	0	0	0	3	39	1	8	0	0	0	26	0	0	0	0
GCC	0	0	0	0	0	87	0	0	0	0	0	0	0	0	0	0	0	0	0	0	0	27	0	0	0	0	0	0	0	0	0	0	0	3	0	0	14	0	7	35	0	3	0	0	0	25	0	0	0
GCG	0	0	0	0	0	0	16	0	0	0	0	0	0	0	0	0	0	0	0	0	0	0	4	0	0	0	0	0	0	0	0	0	0	0	17	0	74	6	0	9	0	0	3	0	0	0	112	0	0
GCT	0	0	0	0	0	0	0	69	0	0	0	0	0	0	0	0	0	0	0	0	0	0	0	5	0	0	0	0	0	0	0	0	0	0	0	2	1	56	10	0	0	0	0	2	0	0	0	26	0
GGA	0	0	0	0	0	0	0	0	19	0	0	0	0	0	0	0	0	0	0	0	0	0	0	0	1	0	0	0	0	0	0	0	22	0	0	0	4	0	0	0	0	2	22	0	1	0	0	0	0
GGC	0	0	0	0	0	0	0	0	0	90	0	0	0	0	0	0	0	0	0	0	0	0	0	0	0	4	0	0	0	0	0	0	0	17	0	0	0	17	0	0	6	0	7	23	0	11	0	0	0
GGG	0	0	0	0	0	0	0	0	0	0	24	0	0	0	0	0	0	0	0	0	0	0	0	0	0	0	2	0	0	0	0	0	0	0	15	0	0	0	9	0	36	5	0	5	0	0	6	0	0
GGT	0	0	0	0	0	0	0	0	0	0	0	22	0	0	0	0	0	0	0	0	0	0	0	0	0	0	0	3	0	0	0	0	0	0	0	12	0	0	0	5	0	17	1	0	0	0	0	7	0
GTA	0	0	0	0	0	0	0	0	0	0	0	0	35	0	0	0	0	0	0	0	0	0	0	0	0	0	0	0	8	0	0	0	0	0	0	0	19	0	0	0	0	0	0	0	0	0	13	0	0
GTC	0	0	0	0	0	0	0	0	0	0	0	0	0	87	0	0	0	0	0	0	0	0	0	0	0	0	0	0	0	14	0	0	0	2	0	0	0	10	0	0	0	0	0	0	2	0	2	12	0
GTG	0	0	0	0	0	0	0	0	0	0	0	0	0	0	94	0	0	0	0	0	0	0	0	0	0	0	0	0	0	0	18	0	0	0	12	0	0	0	73	0	0	0	9	0	20	4	0	18	0
GTT	0	0	0	0	0	0	0	0	0	0	0	0	0	0	0	35	0	0	0	0	0	0	0	0	0	0	0	0	0	0	0	3	0	0	0	0	0	0	0	7	0	0	0	1	1	15	4	0	0
TAA	0	0	0	0	0	0	0	0	0	0	0	0	0	0	0	0	1	0	0	0	0	0	0	0	0	0	0	0	0	0	0	0	0	0	0	0	0	0	0	0	0	0	0	0	0	0	0	0	0
TAC	0	10	0	0	0	0	0	0	0	0	0	0	0	0	0	0	0	11	0	0	0	0	0	0	0	0	0	0	0	0	0	0	0	0	0	0	0	0	0	0	0	0	0	0	0	0	0	0	0
TAG	0	0	0	0	0	0	0	0	0	0	0	0	0	0	0	0	0	0	0	0	0	0	0	0	0	0	0	0	0	0	0	0	0	0	0	0	0	0	0	0	0	0	0	0	0	0	0	0	1
TAT	0	0	0	0	0	0	0	0	0	0	0	0	0	0	0	0	0	0	0	10	0	0	0	0	0	0	0	0	0	0	0	0	0	0	0	3	0	0	0	0	0	0	0	0	0	0	0	0	0
TCA	0	0	0	0	0	0	0	0	0	0	0	0	0	0	0	0	0	0	0	0	13	0	0	0	0	0	0	0	0	0	0	0	0	0	0	0	10	0	0	0	0	0	0	0	0	0	0	0	6
TCC	0	0	0	0	0	8	0	0	0	0	0	0	0	0	0	0	0	0	0	0	0	22	0	0	0	0	0	0	0	0	0	0	0	0	0	0	0	21	0	0	0	0	0	0	0	0	0	0	0
TCG	0	0	0	0	0	0	1	0	0	0	0	0	0	0	0	0	0	0	0	0	0	0	1	0	0	0	0	0	0	0	0	0	0	0	0	0	0	0	2	0	0	0	0	0	0	0	0	0	0
TCT	0	0	0	0	0	0	0	9	0	0	0	0	0	0	0	0	0	0	0	0	0	0	0	16	0	0	0	0	0	0	0	0	0	0	0	0	0	0	0	30	0	0	0	0	0	0	0	0	0
TGA	0	0	0	0	0	0	0	0	0	0	0	0	0	0	0	0	0	0	0	0	0	0	0	0	0	0	0	0	0	0	0	0	0	0	0	0	0	0	0	0	0	0	0	0	0	0	0	0	2
TGC	0	0	0	0	0	0	0	0	0	1	0	0	0	0	0	0	0	0	0	0	0	0	0	0	0	25	0	0	0	0	0	0	0	0	0	0	0	0	0	0	0	1	0	0	0	0	0	0	0
TGG	0	0	0	0	0	0	0	0	0	0	2	0	0	0	0	0	0	0	0	0	0	0	0	0	0	0	34	0	0	0	0	0	0	0	0	0	0	0	0	0	0	0	1	0	0	0	0	0	0
TGT	0	0	0	0	0	0	0	0	0	0	0	0	0	0	0	0	0	0	0	0	0	0	0	0	0	0	0	13	0	0	0	0	0	0	0	0	0	0	0	0	0	0	0	3	0	0	0	0	0
TTA	0	0	0	0	0	0	0	0	0	0	0	0	0	0	0	0	0	0	0	0	0	0	0	0	0	0	0	0	15	0	0	0	0	0	0	0	0	0	0	0	0	0	0	0	3	0	0	0	0
TTC	0	0	0	0	0	0	0	0	0	0	0	0	0	1	0	0	0	0	0	0	0	0	0	0	0	0	0	0	0	12	0	0	0	0	0	0	0	0	0	0	0	0	0	0	0	0	0	0	0
TTG	0	0	0	0	0	0	0	0	0	0	0	0	0	0	11	0	0	0	0	0	0	0	0	0	0	0	0	0	0	0	26	0	0	0	0	0	0	0	0	0	0	0	0	0	0	0	3	0	0
TTT	0	0	0	0	0	0	0	0	0	0	0	0	0	0	0	4	0	0	0	0	0	0	0	0	0	0	0	0	0	0	0	17	0	0	0	0	0	0	0	0	0	0	0	0	0	0	0	2	0
[truncated: 15 more columns]
