# Supplementary material for: Identification of single nucleotide polymorphisms (SNPs) potentially associated with residual feed intake in Qinchuan beef cattle by hypothalamus and duodenum RNA-Seq data
Source: PeerJ. 2025 Apr 15;13:e19270. doi: 10.7717/peerj.19270 (PMC12007499; doi:10.7717/peerj.19270)
Supplement: Supplemental Information 7 [file peerj-13-19270-s007.xlsx]

## Sheet: sheet1
Table S7: Gene screening based on GO and KEGG
Gene ID	GO term	KEGG term	Group
ND6	oxidoreductase activity, acting on NADH or NADPH	Thermogenesis; Metabolic pathways	Low RFI
ND4	oxidoreductase activity, acting on NADH or NADPH	Thermogenesis; Metabolic pathways	Low RFI
ND5	oxidoreductase activity, acting on NADH or NADPH	Thermogenesis; Metabolic pathways	Low RFI
CYB5R3	oxidoreductase activity, acting on NADH or NADPH		Low RFI
ADCY6		Thermogenesis	Low RFI
OCRL		Metabolic pathways	Low RFI
QPRT		Metabolic pathways	Low RFI
GSS		Metabolic pathways	Low RFI
GLYCTK		Metabolic pathways	Low RFI
PGM2L1		Metabolic pathways	Low RFI
PIGL		Metabolic pathways	Low RFI
HPRT1		Metabolic pathways	Low RFI
DPYD		Metabolic pathways	Low RFI
GSTZ1		Metabolic pathways	Low RFI
ADCY6		Metabolic pathways	Low RFI
ALDH2		Metabolic pathways	Low RFI
IMPA1		Metabolic pathways	Low RFI
HACD1		Metabolic pathways	Low RFI
MAP3K7		TNF signaling pathway	Low RFI
DNM1L		TNF signaling pathway	Low RFI
ATF6B		TNF signaling pathway	Low RFI
ALB		Thyroid hormone synthesis	High RFI
ATP1A2		Thyroid hormone synthesis；Gastric acid secretion；cAMP signaling pathway；Pancreatic secretion	High RFI
SLC9A4	multicellular organismal development	Gastric acid secretion	High RFI
AFDN		cAMP signaling pathway	High RFI
PAK1	multicellular organismal development；positive regulation of metabolic process	cAMP signaling pathway；Ras signaling pathway	High RFI
PLA2G5		Pancreatic secretion；Ras signaling pathway	High RFI
ADGRL3	multicellular organismal development	Ras signaling pathway	High RFI
CELA1	multicellular organismal development；positive regulation of metabolic process		High RFI
CEP120	multicellular organismal development		High RFI
EIF2AK3	multicellular organismal development；positive regulation of metabolic process		High RFI
EPC1	positive regulation of metabolic process		High RFI
EPM2A	multicellular organismal development；positive regulation of metabolic process		High RFI
FN1	multicellular organismal development；positive regulation of metabolic process		High RFI
HSP90AA1	positive regulation of metabolic process		High RFI
LPAR1	multicellular organismal development		High RFI
PAF1	multicellular organismal development；positive regulation of metabolic process		High RFI
SND1	multicellular organismal development		High RFI
TDP2	multicellular organismal development		High RFI
